# Supplementary material
Source: PubMed Central journal article supplement (PMC5405457)

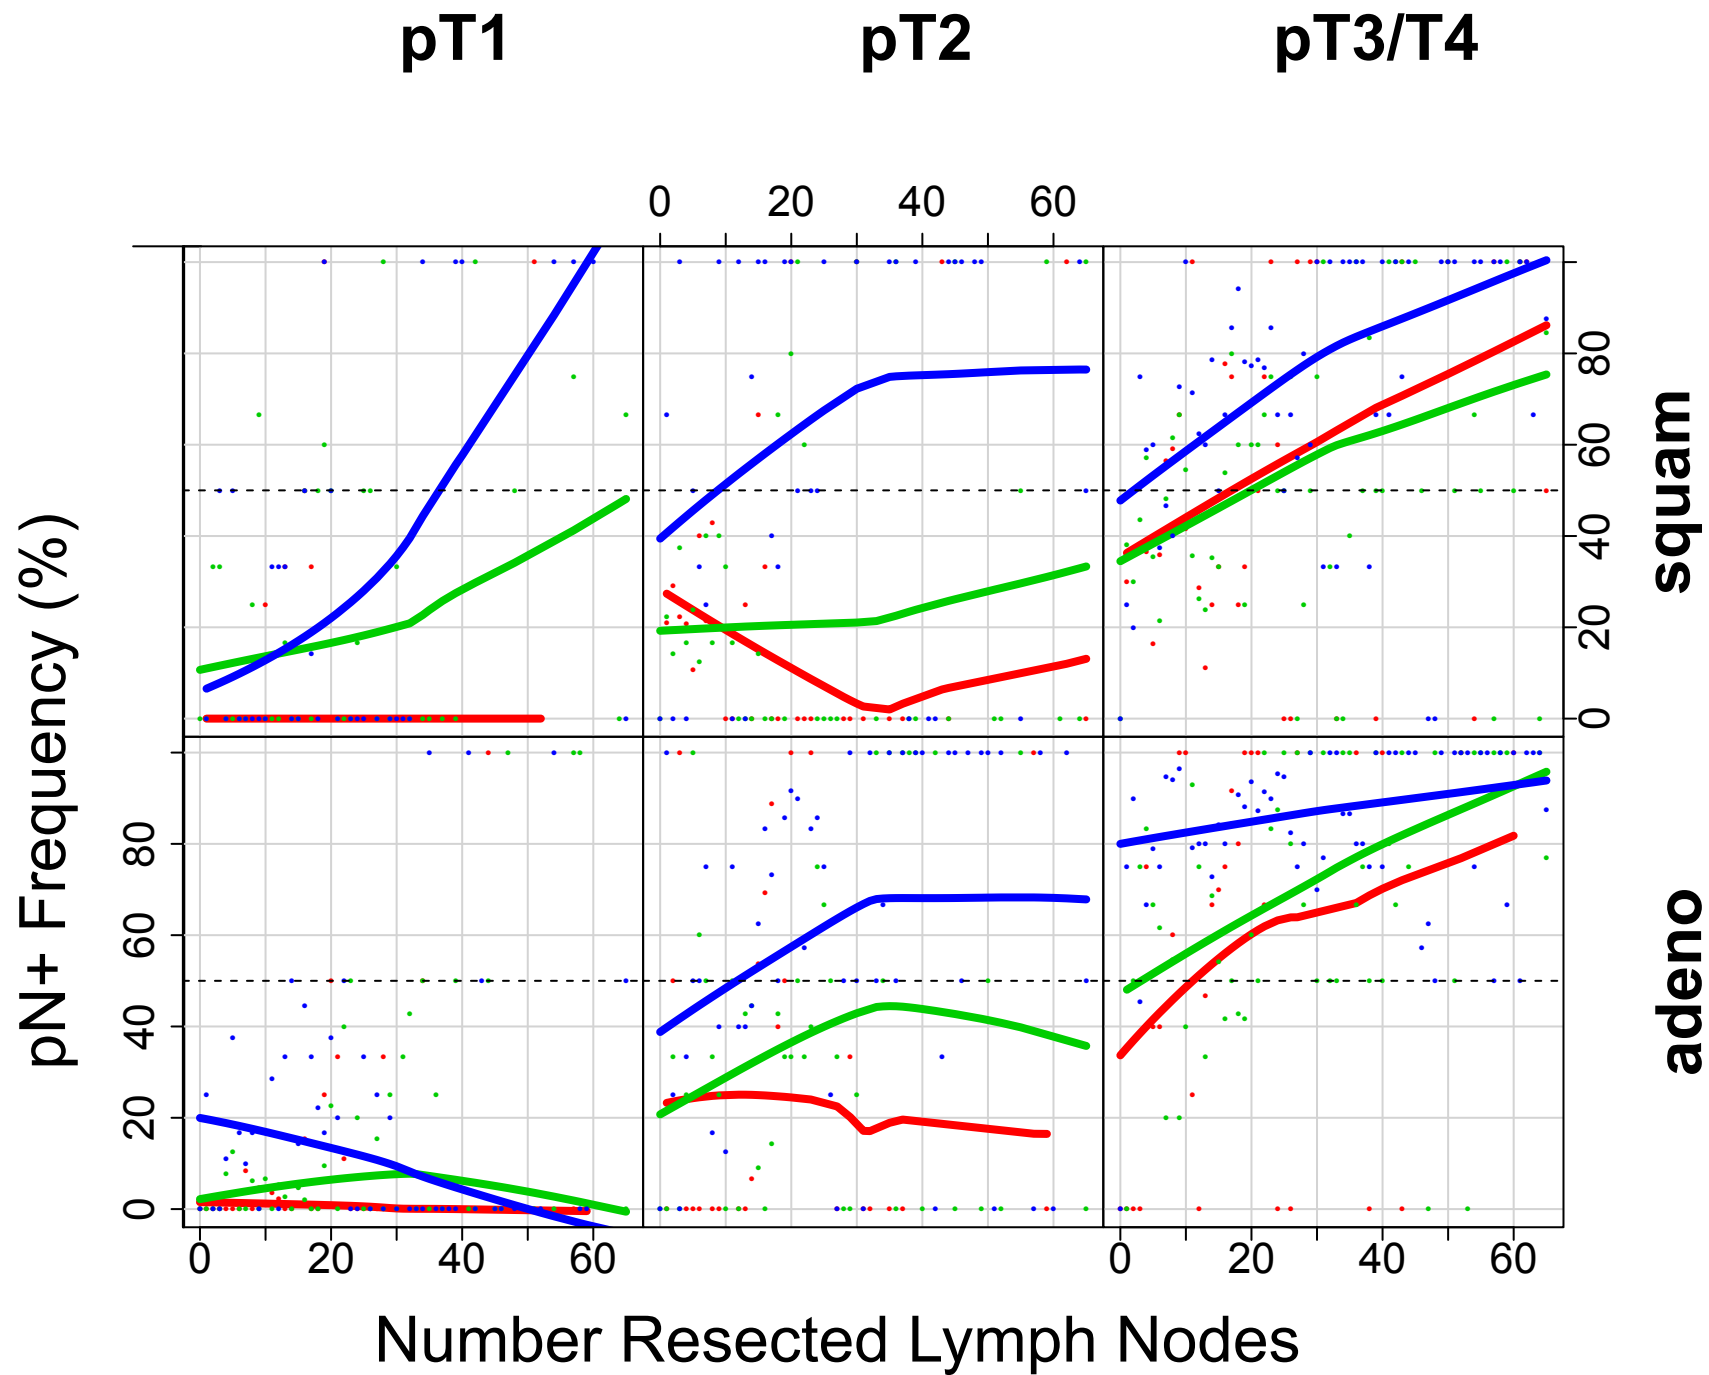

Supplement: NIHMS847502-supplement-Supplemental_Data_File_1.pdf [file NIHMS847502-supplement-Supplemental_Data_File_1.pdf]

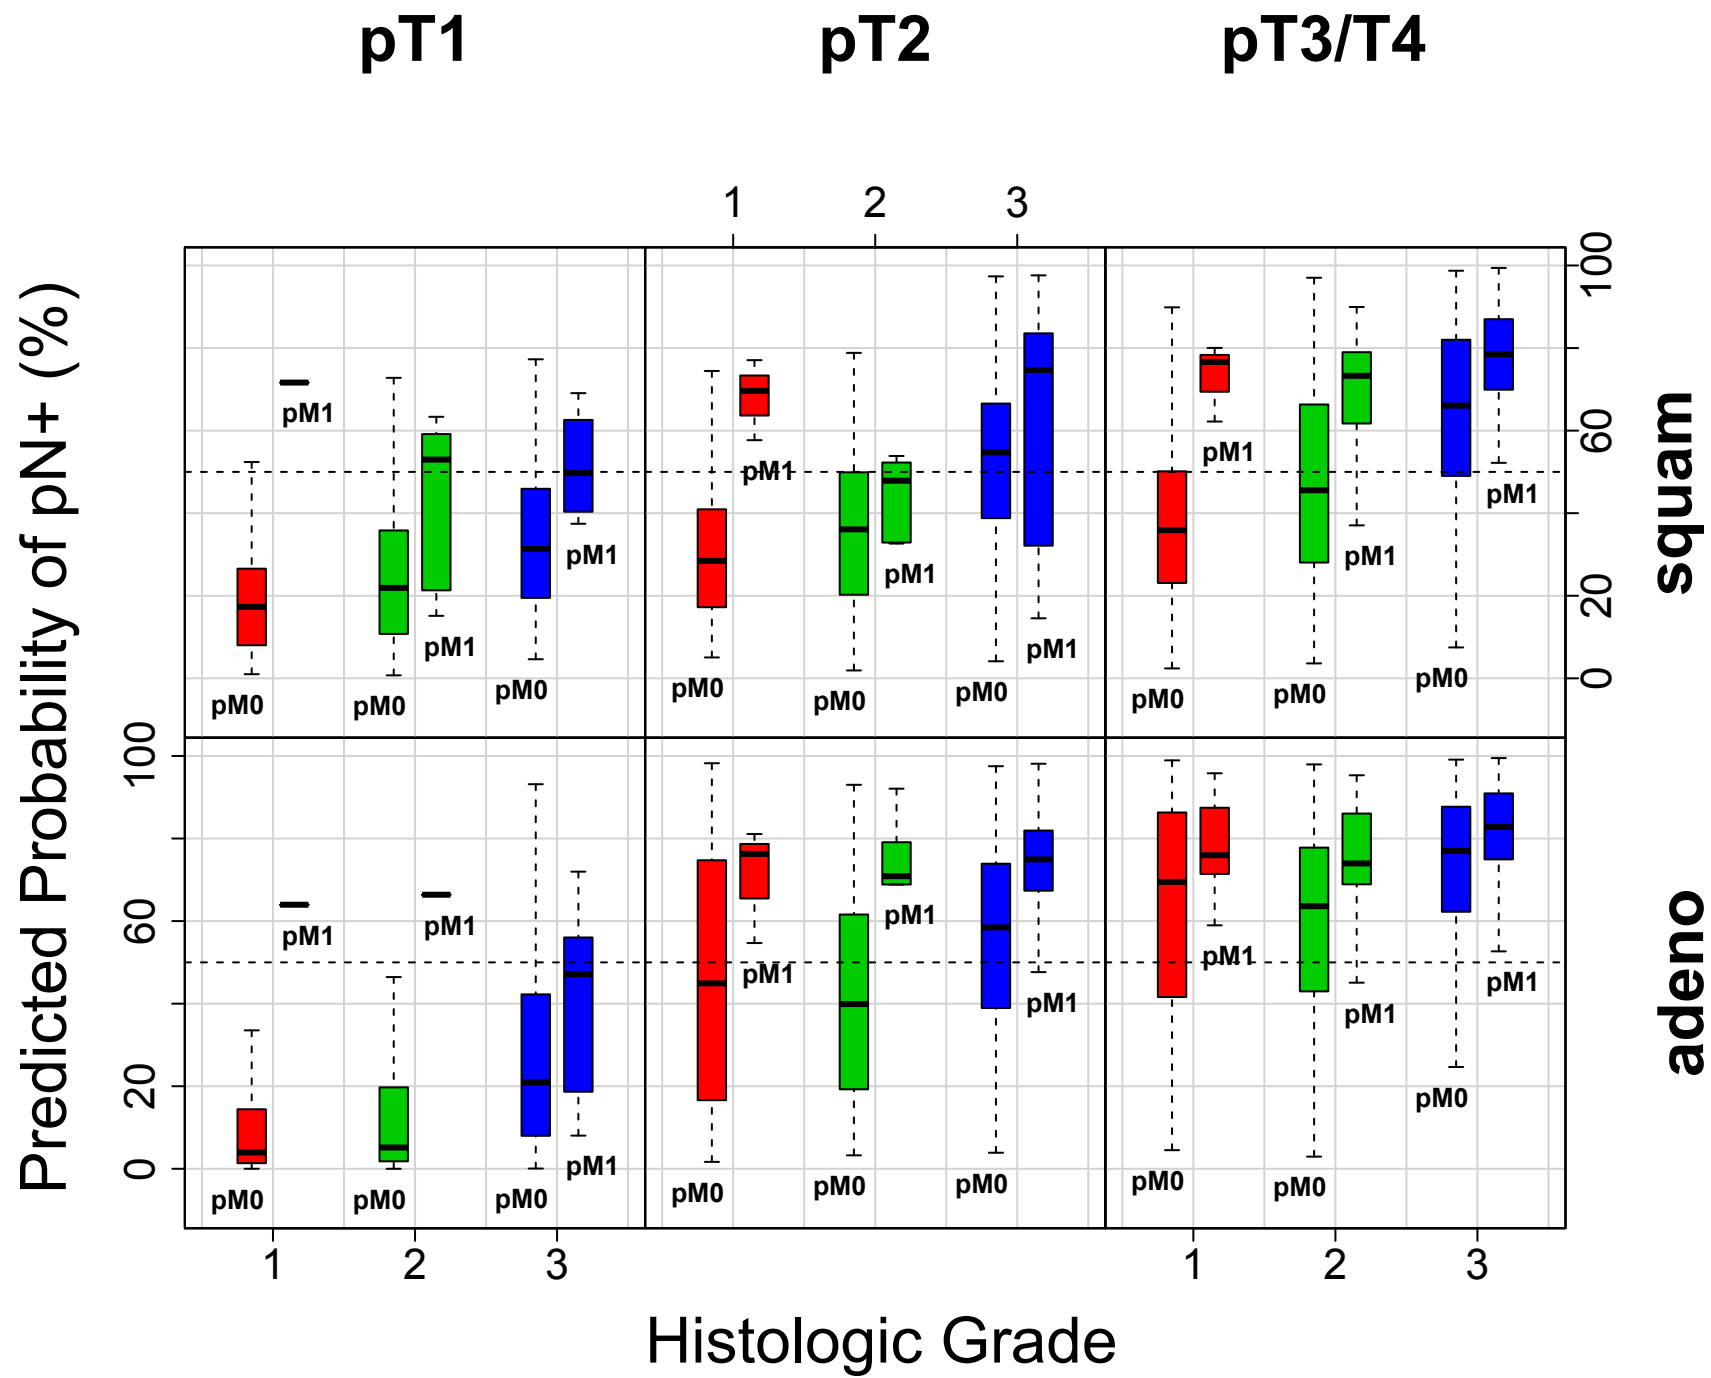

Supplement: NIHMS847502-supplement-Supplemental_Data_File_2.pdf [file NIHMS847502-supplement-Supplemental_Data_File_2.pdf]

**pT1**

**pT2**

**pT3/T4**

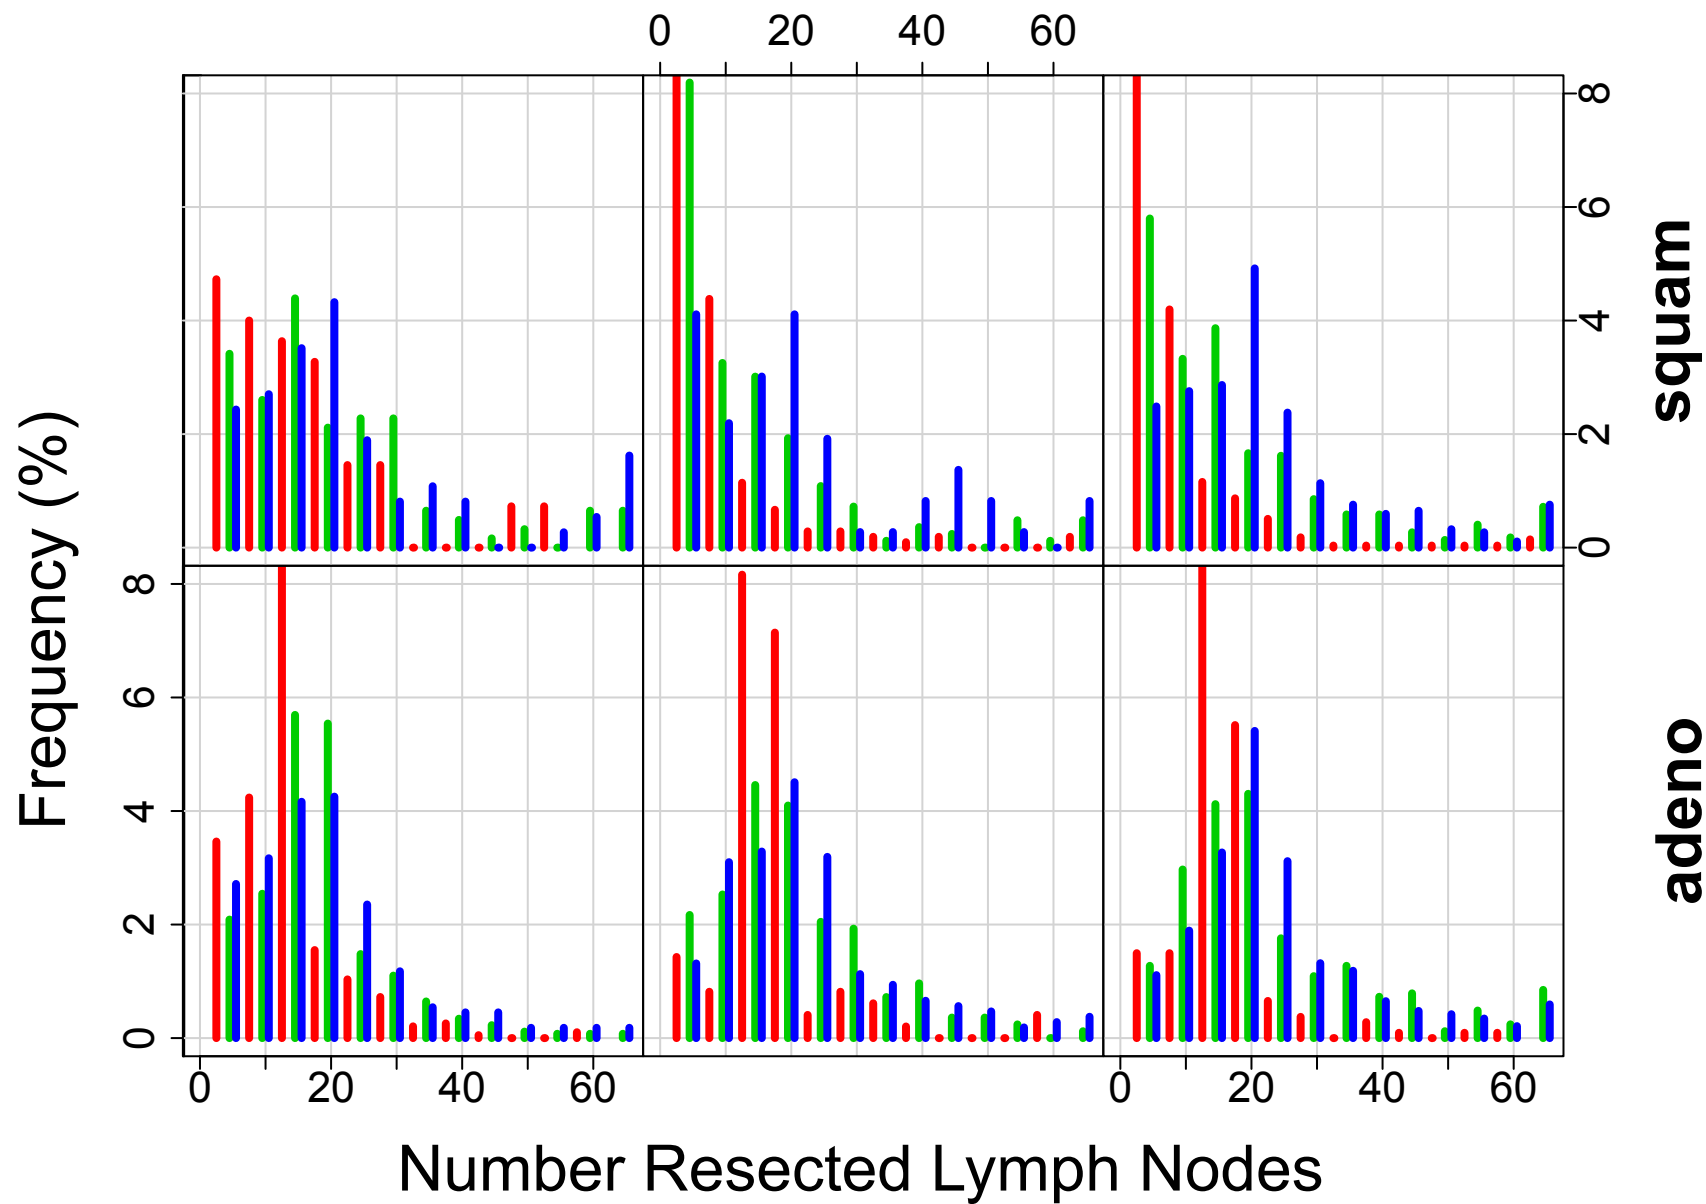

Supplement: NIHMS847502-supplement-Supplemental_Data_File_3.pdf [file NIHMS847502-supplement-Supplemental_Data_File_3.pdf]
